# Supplementary material for: CVD-grown phase-pure V 2 C nanosheets with pseudocapacitive behavior for fast and stable lithium-ion storage
Source: Royal Society of Chemistry journal article supplement (doi:10.1039/d5ta09038e), 2025-12-23
Supplement: d5ta09038e1.pdf [file d5ta09038e1.pdf]

# CVD-Grown Phase-Pure V<sub>2</sub>C Nanosheets with Pseudocapacitive Behavior for Fast and Stable Lithium-Ion Storage

Wei Ding<sup>1</sup>, Deniz Cakir<sup>2,\*</sup>, Laxmi Raj Jaishi<sup>1</sup>, Jiahui Yuan<sup>1,3</sup>, Mohd Anas<sup>4</sup>, Parashu Kharel<sup>4</sup>, Bin Yao<sup>5</sup>, Xiaojun Xian<sup>1,\*</sup>

1. McComish Department of Electrical Engineering and Computer Science, Jerome J. Lohr College of Engineering, South Dakota State University, Brookings, South Dakota 57007, USA
2. Department of Physics & Astrophysics, University of North Dakota, Grand Forks, North Dakota 58202, USA
3. Department of Agricultural and Biosystems Engineering, South Dakota State University, Brookings, South Dakota 57007, USA
4. Department of Chemistry, Biochemistry and Physics, South Dakota State University, Brookings, South Dakota 57007, USA
5. Department of Chemistry, Biology, and Health Sciences, South Dakota School of Mines and Technology Rapid City, South Dakota 57701, USA

## Corresponding Authors

\*E-mail (D. Cakir): deniz.cakir@UND.edu

\*E-mail (X. Xian): xiaojun.xian@sdstate.edu

## **Table of contents**

**Figure S1** XPS survey spectra for the V<sub>2</sub>C nanosheets.

**Figure S2** Charge/discharge voltage curve as a function of specific capacity of V<sub>2</sub>C nanosheets at different current density ranging from 0.1 to 5 A g<sup>-1</sup>

**Figure S3** Charge/discharge voltage curve as a function of specific capacity of V<sub>2</sub>C nanosheets at different cycles at 0.1 A g<sup>-1</sup>

**Figure S4** Charge/discharge voltage curve as a function of specific capacity of V<sub>2</sub>C nanosheets at different cycles at 1 A g<sup>-1</sup>

**Figure S5** Equivalent circuit used for fitting EIS data

**Figure S6.** XPS spectra of C 1s in the V<sub>2</sub>C electrode after 100 cycles.

**Table S1** XPS fitting result for V<sub>2</sub>C nanosheets

**Table S2** Comparison of V<sub>2</sub>C anodes reported in the literatures of lithium-ion batteries

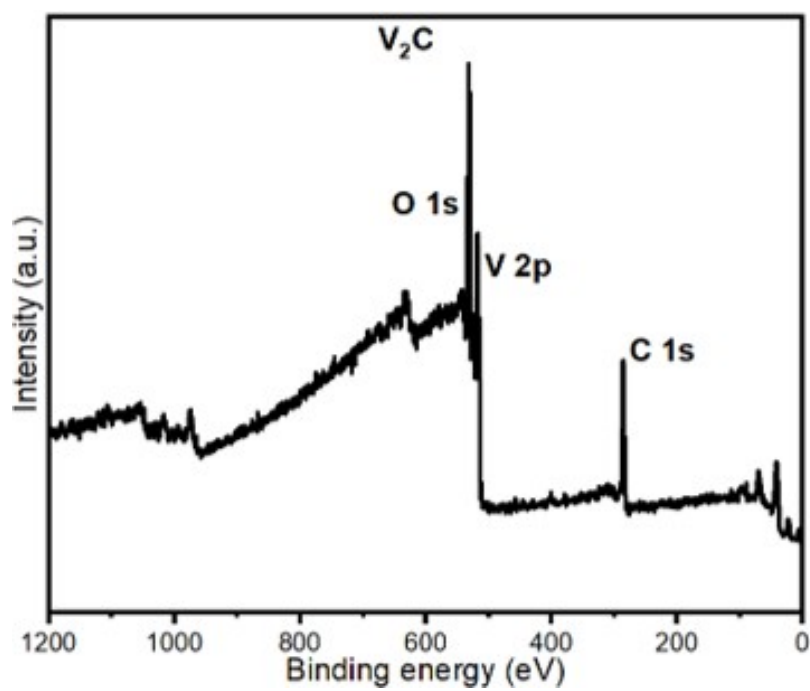

**Figure S1.** XPS survey spectra of the V<sub>2</sub>C nanosheets.

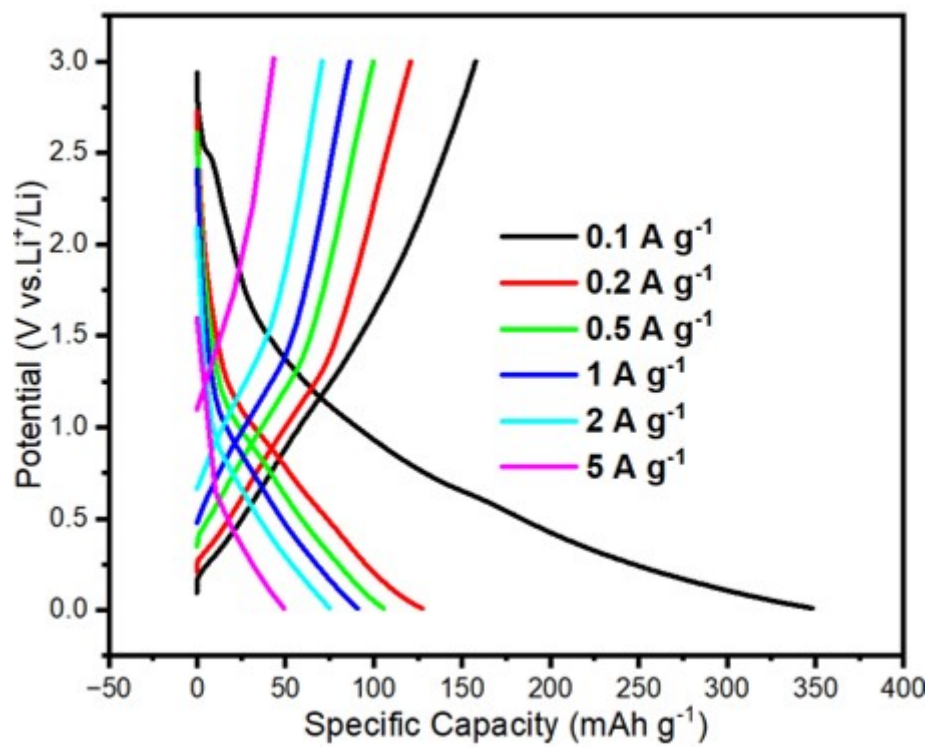

**Figure S2.** Charge/discharge voltage curve as a function of specific capacity of  $\text{V}_2\text{C}$  nanosheets at different current density ranging from 0.1 to 5  $\text{A g}^{-1}$ .

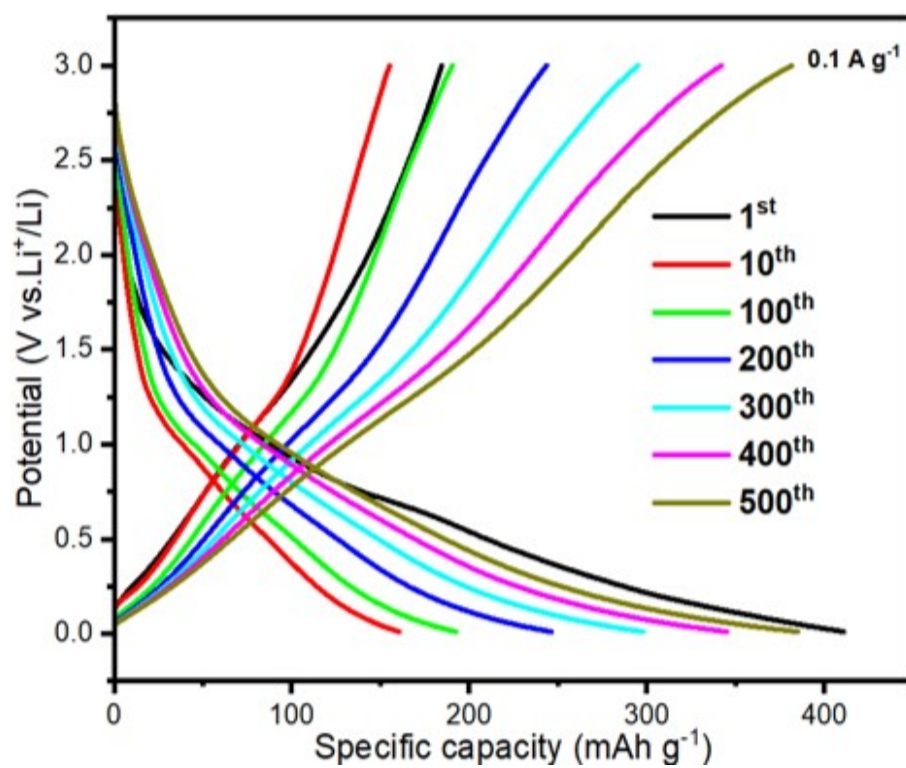

**Figure S3.** Charge/discharge voltage curve as a function of specific capacity of V<sub>2</sub>C nanosheets at different cycles at 0.1 A g<sup>-1</sup>.

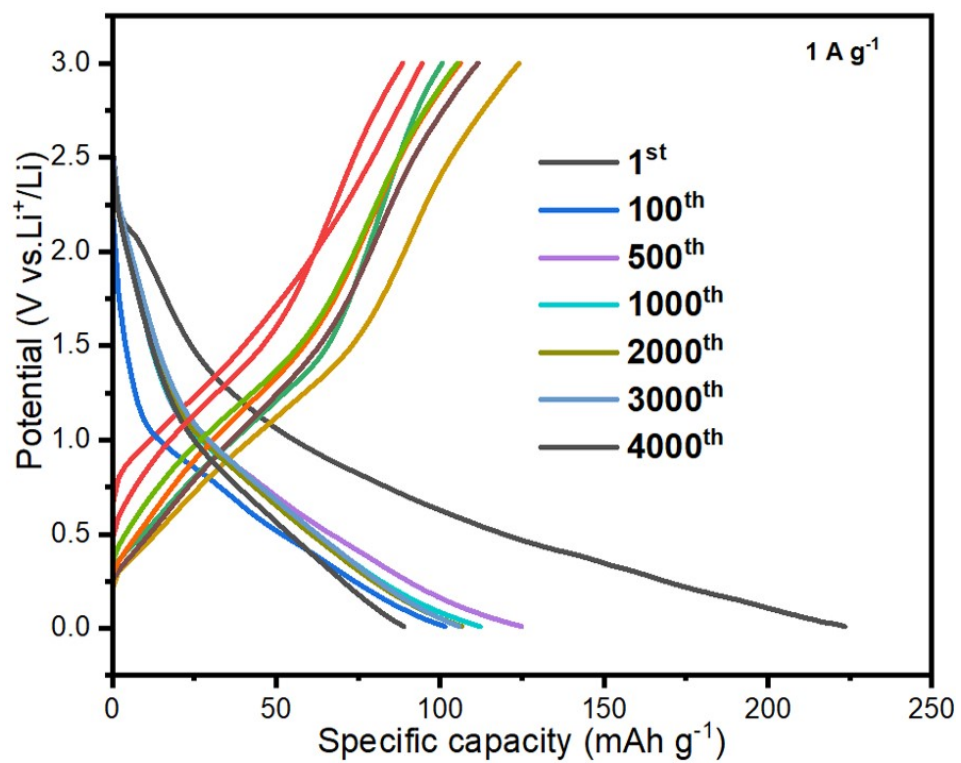

**Figure S4.** Charge/discharge voltage curve as a function of specific capacity of V<sub>2</sub>C nanosheets at different cycles at 1 A g<sup>-1</sup>.

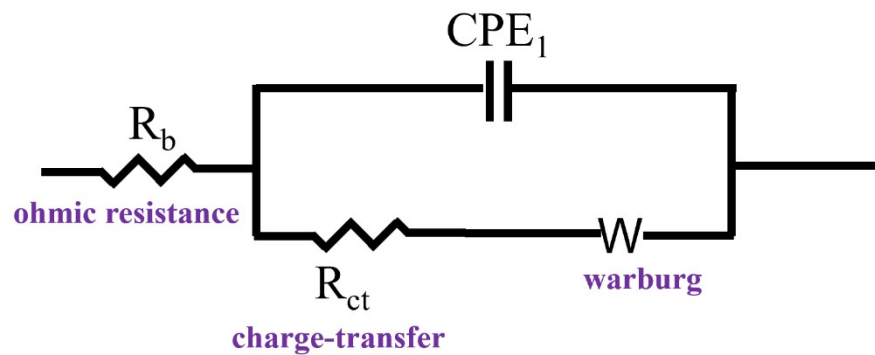

**Figure S5.** Equivalent circuit used for fitting EIS data.

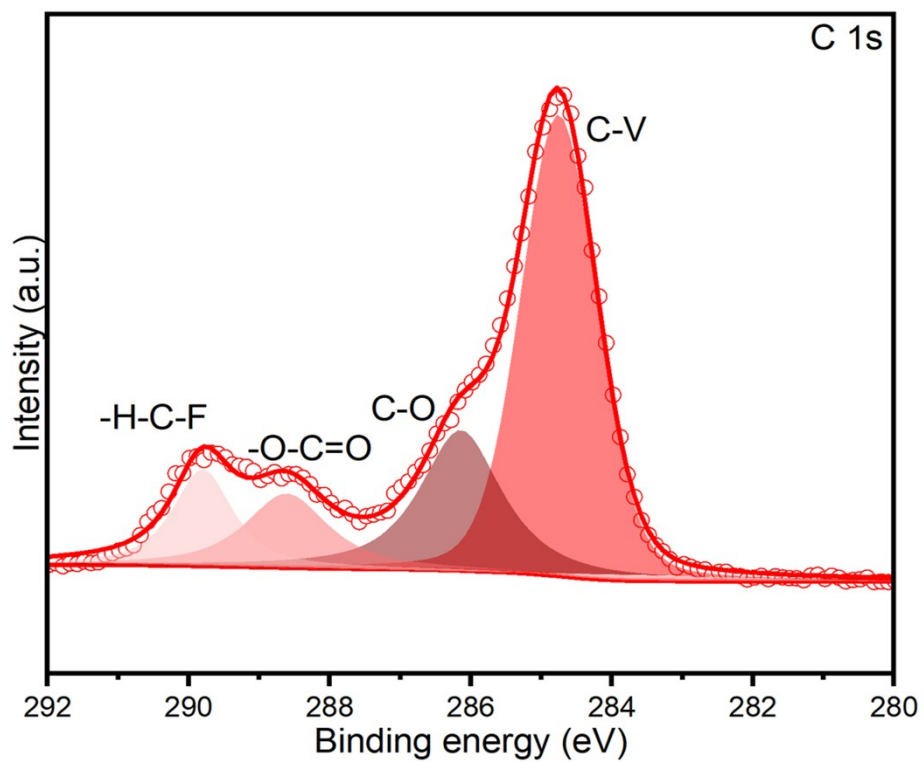

**Figure S6.** XPS spectra of C 1s in the  $V_2C$  electrode after 100 cycles.

**Table S1.** XPS fitting result for V<sub>2</sub>C nanosheets

| Material         | Element | Position (eV) | FWHM | Area     | Bond            |
|------------------|---------|---------------|------|----------|-----------------|
| V <sub>2</sub> C | C 1s    | 282.79        | 0.56 | 1186.483 | C-V             |
|                  |         | 284.57        | 1.07 | 4931.45  | C-C             |
|                  |         | 285.27        | 1.55 | 2660.01  | C-O             |
|                  | V 2p    | 513.49        | 1.19 | 2920.65  | V2 <sup>+</sup> |
|                  |         | 515.53        | 2.61 | 8627.52  | V3 <sup>+</sup> |
|                  |         | 516.83        | 2.02 | 5389.38  | V4 <sup>+</sup> |
|                  |         | 521.49        | 1.94 | 1457.32  | V2 <sup>+</sup> |
|                  |         | 523.84        | 2.26 | 2963.53  | V3 <sup>+</sup> |
|                  | C 1s    | 284.72        | 1.27 | 5840.72  | C-V             |
|                  |         | 286.08        | 1.70 | 2905.68  | C-O             |
|                  |         | 288.57        | 1.52 | 1212.10  | O-C=O           |
|                  |         | 289.85        | 1.23 | 1133.30  | -H-C-F-         |
|                  |         | 516.41        | 1.80 | 1897.11  | V3 <sup>+</sup> |
|                  |         | 517.25        | 1.30 | 2252.24  | V4 <sup>+</sup> |
|                  |         | 524.25        | 2.55 | 1551.90  | V3 <sup>+</sup> |



**Table S2.** Comparison of V<sub>2</sub>C anodes reported in the literatures of lithium-ion batteries.

| Materials                   | Current density<br>(A g <sup>-1</sup> ) | Cycle numbers | Specific capacity<br>(mAh g <sup>-1</sup> ) | References |
|-----------------------------|-----------------------------------------|---------------|---------------------------------------------|------------|
| V <sub>2</sub> C nanosheets | 0.1                                     | 500           | 385.2                                       | This work  |
| V <sub>2</sub> C MXene      | 0.074                                   | 100           | 254                                         | 1          |
| V <sub>2</sub> C MXene      | 0.1                                     | 140           | 257                                         | 2          |
| V <sub>2</sub> C            | 0.1                                     | 300           | 223.6                                       | 3          |
| V <sub>2</sub> C            | 0.1                                     | 10            | 228                                         | 4          |
| V <sub>2</sub> C            | 0.1                                     | 120           | 172.2                                       |            |
| V <sub>2</sub> C-5          | 0.1                                     | 120           | 190                                         |            |
| V <sub>2</sub> C-10         | 0.1                                     | 120           | 429.5                                       | 5          |
| V <sub>2</sub> C-20         | 0.1                                     | 120           | 281.9                                       |            |
| V <sub>2</sub> C-30         | 0.1                                     | 120           | 235.7                                       |            |

## References

1. J. Zhou, S. Gao, Z. Guo and Z. Sun, *Ceramics International*, 2017, **43**, 11450-11454.
2. F. Liu, J. Zhou, S. Wang, B. Wang, C. Shen, L. Wang, Q. Hu, Q. Huang and A. Zhou, *Journal of The Electrochemical Society*, 2017, **164**, A709.
3. R. J. Liu, L. X. Yang, Y. Wang, H. P. Bu, H. J. Liu and C. L. Zeng, *Journal of Solid State Electrochemistry*, 2022, **26**, 831-842.
4. Y. Guan, B. Xiao, X. Zhang, L. Xiong, J. Liu, Y. Ding, Z. Wang, Y. Pi and Y. Cong, *Journal of Alloys and Compounds*, 2025, **1010**, 177171.
5. F. Liu, Y. Liu, X. Zhao, K. Liu, H. Yin and L. Z. Fan, *Small*, 2020, **16**, 1906076.
